# Supplementary material for: Mutational patterns and regulatory networks in epigenetic subgroups of meningioma
Source: Springer Nature journal article supplement (doi:10.1007/s00401-019-02008-w), 2019-05-08
Supplement: MOESM3 [file 16708904]

## Sheet: methy_groupwise_significantly_e
Gene	MC	Fisher’s exact test
TRAF7	ben-2	1.6641e-05
NF2	ben-1	9.35523e-05
KDM6A	malignant	0.00213661
AKT1	ben-2	0.00611281
USH2A	int-A	0.0307471
